# Supplementary material
Source: publisher figshare collection journal article supplement (https://tandf.figshare.com/articles/dataset/_/23557217)
Supplement: Supplementary file 1 [file 1]

# Appendix

## 1 Proofs of consistency and the central limit theorem

We begin by establishing some standard results regarding the asymptotic behavior of the singular values of  $\mathbf{P}$ ,  $\mathbf{A}$  and  $\mathbf{A} - \mathbf{P}$ . Recall that for  $\mathbf{Z} \sim F$ , the minimal dimensionality condition from Assumption 1 states that the random vector  $\mathbf{X} = \phi(\mathbf{Z})$  has second moment matrix  $\mathbf{\Delta} = \mathbb{E}(\mathbf{X}\mathbf{X}^\top)$  with full rank  $d$ . Therefore, a combination of a Hoeffding-style argument and a corollary of Weyl's inequalities (Horn and Johnson (2012), Corollary 7.3.5) shows that the  $d$  non-zero singular values  $\sigma_i(\mathbf{P})$  satisfy  $\sigma_i(\mathbf{P}) = \Omega(n)$  almost surely. By showing that the spectral norm of  $\mathbf{A} - \mathbf{P}$  has smaller asymptotic growth, we can once again invoke Weyl's argument to show that the top  $d$  singular values  $\sigma_i(\mathbf{A})$  also satisfy  $\sigma_i(\mathbf{A}) = \Omega(n)$ .

**Proposition 1.**  $\|\mathbf{A} - \mathbf{P}\| = O\left(n^{1/2} \log^{\alpha+1/2}(n)\right)$  almost surely.

*Proof.* We will make use of a matrix analogue of the Bernstein inequality (Tropp (2015), Theorem 1.6.2):

**Theorem 3** (Matrix Bernstein). Let  $\mathbf{M}_1, \dots, \mathbf{M}_n \in \mathbb{R}^{n \times n}$  be symmetric independent random matrices satisfying  $\mathbb{E}(\mathbf{M}_k) = 0$  and  $\|\mathbf{M}_k\| \leq L$  for each  $1 \leq k \leq n$ , for some fixed value  $L$ .

Let  $\mathbf{M} = \sum_{k=1}^n \mathbf{M}_k$  and let  $v(\mathbf{M}) = \|\mathbb{E}(\mathbf{M}\mathbf{M}^\top)\|$  denote the matrix variance statistic of  $\mathbf{M}$ . Then for all  $t \geq 0$ :

$$\mathbb{P}(\|\mathbf{M}\| \geq t) \leq 2n \exp\left(\frac{-t^2/2}{v(\mathbf{M}) + Lt/3}\right).$$

We apply this theorem as follows: for each  $1 \leq i \leq j \leq n$ , let  $\mathbf{M}_{ij}$  be the  $n \times n$  matrix with  $(i, j)^{\text{th}}$  and  $(j, i)^{\text{th}}$  entries equal to  $\mathbf{A}_{ij} - \mathbf{P}_{ij}$ , and all other entries equal to 0. Then

$$\|\mathbf{M}_{ij}\| = |\mathbf{A}_{ij} - \mathbf{P}_{ij}| < 2\beta \log^\alpha(n)$$

almost surely, and  $\mathbb{E}(\mathbf{M}_{ij}) = 0$ , and so the matrix  $\mathbf{M} = \sum \mathbf{M}_{ij} = \mathbf{A} - \mathbf{P}$  satisfies the criteria for Bernstein's theorem.

To bound the matrix variance statistic  $v(\mathbf{M})$ , observe that

$$(\mathbf{M}\mathbf{M}^\top)_{ij} = \sum_{k=1}^n (\mathbf{A}_{ik} - \mathbf{P}_{ik})(\mathbf{A}_{jk} - \mathbf{P}_{jk}),$$

and thus

$$\mathbb{E}\{(\mathbf{M}\mathbf{M}^\top)_{ij}\} = \begin{cases} \sum_{k=1}^n \text{Var}(\mathbf{A}_{ik}) & i = j \\ 0 & i \neq j \end{cases}$$

By Popoviciu's inequality, the variances  $\text{Var}(\mathbf{A}_{ij})$  are bounded in absolute value by  $\beta^2 \log^{2\alpha}(n)$ , and so, since the matrix  $\mathbb{E}(\mathbf{M}\mathbf{M}^\top)$  is diagonal, we see that

$$v(\mathbf{M}) \leq \beta^2 n \log^{2\alpha}(n)$$

almost surely, and after substituting into Theorem 3 we find that for any  $t \geq 0$ ,

$$\mathbb{P}(\|\mathbf{A} - \mathbf{P}\| \geq t) \leq 2n \exp\left(\frac{-3t^2}{6\beta^2 n \log^{2\alpha}(n) + 4\beta \log^\alpha(n)t}\right)$$

almost surely.

The numerator of the exponential term dominates for  $n$  sufficiently large if  $t = cn^{1/2} \log^{\alpha+1/2}(n)$ , and therefore  $\|\mathbf{A} - \mathbf{P}\| = O\left(n^{1/2} \log^{\alpha+1/2}(n)\right)$  almost surely, as required.  $\square$

The following result follows from an identical argument as that used in the proof of Lemma 17 in Lyzinski et al. (2016):

**Proposition 2.**  $\|\mathbf{U}_{\mathbf{P}}^\top(\mathbf{A} - \mathbf{P})\mathbf{U}_{\mathbf{P}}\|_F = O\left(\log^{\alpha+1/2}(n)\right)$  almost surely.

**Proposition 3.** The following bounds hold almost surely:

- i.*  $\|\mathbf{U}_{\mathbf{A}}\mathbf{U}_{\mathbf{A}}^\top - \mathbf{U}_{\mathbf{P}}\mathbf{U}_{\mathbf{P}}^\top\| = O\left(n^{-1/2} \log^{\alpha+1/2}(n)\right);$
- ii.*  $\|\mathbf{U}_{\mathbf{A}} - \mathbf{U}_{\mathbf{P}}\mathbf{U}_{\mathbf{P}}^\top\mathbf{U}_{\mathbf{A}}\|_F = O\left(n^{-1/2} \log^{\alpha+1/2}(n)\right);$
- iii.*  $\|\mathbf{U}_{\mathbf{P}}^\top\mathbf{U}_{\mathbf{A}}\mathbf{\Lambda}_{\mathbf{A}} - \mathbf{\Lambda}_{\mathbf{P}}\mathbf{U}_{\mathbf{P}}^\top\mathbf{U}_{\mathbf{A}}\|_F = O\left(\log^{2\alpha+1}(n)\right);$
- iv.*  $\|\mathbf{U}_{\mathbf{P}}^\top\mathbf{U}_{\mathbf{A}}\mathbf{I}_{p,q} - \mathbf{I}_{p,q}\mathbf{U}_{\mathbf{P}}^\top\mathbf{U}_{\mathbf{A}}\|_F = O\left(n^{-1} \log^{2\alpha+1}(n)\right)$

*Proof.*

- i.* Let  $\sigma_1, \dots, \sigma_d$  denote the singular values of  $\mathbf{U}_{\mathbf{P}}^\top\mathbf{U}_{\mathbf{A}}$ , and let  $\theta_i = \cos^{-1}(\sigma_i)$  be the principal angles. It is a standard result that the non-zero eigenvalues of the matrix  $\mathbf{U}_{\mathbf{A}}\mathbf{U}_{\mathbf{A}}^\top - \mathbf{U}_{\mathbf{P}}\mathbf{U}_{\mathbf{P}}^\top$  are precisely the  $\sin(\theta_i)$  (each occurring twice) and so, by a variant of Davis-Kahan (Yu et al. (2015), Theorem 4) we have

$$\|\mathbf{U}_{\mathbf{A}}\mathbf{U}_{\mathbf{A}}^\top - \mathbf{U}_{\mathbf{P}}\mathbf{U}_{\mathbf{P}}^\top\| = \mathbf{A}x_{i \in \{1, \dots, d\}}|\sin(\theta_i)| \leq \frac{2\sqrt{d}(2\sigma_1(\mathbf{P}) + \|\mathbf{A} - \mathbf{P}\|)\|\mathbf{A} - \mathbf{P}\|}{\sigma_d(\mathbf{P})^2}$$

for  $n$  sufficiently large.

The spectral norm bound from Proposition 1 then shows that

$$\begin{aligned} \|\mathbf{U}_{\mathbf{A}}\mathbf{U}_{\mathbf{A}}^\top - \mathbf{U}_{\mathbf{P}}\mathbf{U}_{\mathbf{P}}^\top\| &= O\left(\frac{\left\{\sigma_1(\mathbf{P}) + n^{1/2} \log^{\alpha+1/2}(n)\right\} n^{1/2} \log^{\alpha+1/2}(n)}{\sigma_d(\mathbf{P})^2}\right) \\ &= O\left(n^{-1/2} \log^{\alpha+1/2}(n)\right) \end{aligned}$$

since  $\sigma_i(\mathbf{P}) = \Omega(n)$  almost surely.

*ii.* Using the bound from part *i.*, we find that

$$\begin{aligned}\|\mathbf{U}_\mathbf{A} - \mathbf{U}_\mathbf{P}\mathbf{U}_\mathbf{P}^\top\mathbf{U}_\mathbf{A}\|_F &= \|(\mathbf{U}_\mathbf{A}\mathbf{U}_\mathbf{A}^\top - \mathbf{U}_\mathbf{P}\mathbf{U}_\mathbf{P}^\top)\mathbf{U}_\mathbf{A}\|_F \leq \|\mathbf{U}_\mathbf{A}\mathbf{U}_\mathbf{A}^\top - \mathbf{U}_\mathbf{P}\mathbf{U}_\mathbf{P}^\top\| \|\mathbf{U}_\mathbf{A}\|_F \\ &= O\left(n^{-1/2} \log^{\alpha+1/2}(n)\right).\end{aligned}$$

*iii.* Observe that

$$\begin{aligned}\mathbf{U}_\mathbf{P}^\top\mathbf{U}_\mathbf{A}\Lambda_\mathbf{A} - \Lambda_\mathbf{P}\mathbf{U}_\mathbf{P}^\top\mathbf{U}_\mathbf{A}\mathbf{I}_{p,q} &= \mathbf{U}_\mathbf{P}^\top(\mathbf{A} - \mathbf{P})\mathbf{U}_\mathbf{A} \\ &= \mathbf{U}_\mathbf{P}^\top(\mathbf{A} - \mathbf{P})(\mathbf{U}_\mathbf{A} - \mathbf{U}_\mathbf{P}\mathbf{U}_\mathbf{P}^\top\mathbf{U}_\mathbf{A}) + \mathbf{U}_\mathbf{P}^\top(\mathbf{A} - \mathbf{P})\mathbf{U}_\mathbf{P}\mathbf{U}_\mathbf{P}^\top\mathbf{U}_\mathbf{A},\end{aligned}$$

and so

$$\begin{aligned}\|\mathbf{U}_\mathbf{P}^\top\mathbf{U}_\mathbf{A}\Lambda_\mathbf{A} - \Lambda_\mathbf{P}\mathbf{U}_\mathbf{P}^\top\mathbf{U}_\mathbf{A}\|_F &\leq \|\mathbf{U}_\mathbf{P}^\top\| \|\mathbf{A} - \mathbf{P}\| \|\mathbf{U}_\mathbf{A} - \mathbf{U}_\mathbf{P}\mathbf{U}_\mathbf{P}^\top\mathbf{U}_\mathbf{A}\|_F + \|\mathbf{U}_\mathbf{P}^\top(\mathbf{A} - \mathbf{P})\mathbf{U}_\mathbf{P}\|_F \|\mathbf{U}_\mathbf{P}^\top\mathbf{U}_\mathbf{A}\|_F \\ &= O\left(n^{1/2} \log^{\alpha+\frac{1}{2}}(n) \cdot n^{-1/2} \log^{\alpha+1/2}(n)\right) + O\left(\log^{\alpha+1/2}(n)\right) \\ &= O\left(\log^{2\alpha+1}(n)\right),\end{aligned}$$

where we have used Propositions 1, 2 and the result from part *ii.*

*iv.* Note that

$$\begin{aligned}\mathbf{U}_\mathbf{P}^\top\mathbf{U}_\mathbf{A}\mathbf{I}_{p,q} - \mathbf{I}_{p,q}\mathbf{U}_\mathbf{P}^\top\mathbf{U}_\mathbf{A} &= \left\{(\mathbf{U}_\mathbf{P}^\top\mathbf{U}_\mathbf{A}\Lambda_\mathbf{A} - \Lambda_\mathbf{P}\mathbf{U}_\mathbf{P}^\top\mathbf{U}_\mathbf{A}) + (\Sigma_\mathbf{P}\mathbf{U}_\mathbf{P}^\top\mathbf{U}_\mathbf{A} - \mathbf{I}_{p,q}\mathbf{U}_\mathbf{P}^\top\mathbf{U}_\mathbf{A}\Lambda_\mathbf{A})\right\} \Sigma_\mathbf{A}^{-1} \\ &\quad - \Sigma_\mathbf{P}(\mathbf{U}_\mathbf{P}^\top\mathbf{U}_\mathbf{A}\mathbf{I}_{p,q} - \mathbf{I}_{p,q}\mathbf{U}_\mathbf{P}^\top\mathbf{U}_\mathbf{A})\Sigma_\mathbf{A}^{-1}.\end{aligned}$$

where  $\Sigma_\mathbf{A} = \Lambda_\mathbf{A}\mathbf{I}_{p,q}$  and  $\Sigma_\mathbf{P} = \Lambda_\mathbf{P}\mathbf{I}_{p,q}$ .

For any  $i, j \in \{1, \dots, d\}$ , by rearranging and bounding the absolute value of the

right-hand terms by the Frobenius norm, we find

$$\begin{aligned}
& |(\mathbf{U}_{\mathbf{P}}^{\top} \mathbf{U}_{\mathbf{A}} \mathbf{I}_{p,q} - \mathbf{I}_{p,q} \mathbf{U}_{\mathbf{P}}^{\top} \mathbf{U}_{\mathbf{A}})_{ij}| \left(1 + \frac{\sigma_i(\mathbf{P})}{\sigma_j(\mathbf{A})}\right) \\
& \leq (\|\mathbf{U}_{\mathbf{P}}^{\top} \mathbf{U}_{\mathbf{A}} \mathbf{\Lambda}_{\mathbf{A}} - \mathbf{\Lambda}_{\mathbf{P}} \mathbf{U}_{\mathbf{P}}^{\top} \mathbf{U}_{\mathbf{A}}\|_F + \|\mathbf{\Sigma}_{\mathbf{P}} \mathbf{U}_{\mathbf{P}}^{\top} \mathbf{U}_{\mathbf{A}} - \mathbf{I}_{p,q} \mathbf{U}_{\mathbf{P}}^{\top} \mathbf{U}_{\mathbf{A}} \mathbf{\Lambda}_{\mathbf{A}}\|_F) \|\mathbf{\Sigma}_{\mathbf{A}}^{-1}\|_F \\
& = (\|\mathbf{U}_{\mathbf{P}}^{\top} \mathbf{U}_{\mathbf{A}} \mathbf{\Lambda}_{\mathbf{A}} - \mathbf{\Lambda}_{\mathbf{P}} \mathbf{U}_{\mathbf{P}}^{\top} \mathbf{U}_{\mathbf{A}}\|_F + \|\mathbf{\Lambda}_{\mathbf{P}} \mathbf{U}_{\mathbf{P}}^{\top} \mathbf{U}_{\mathbf{A}} - \mathbf{U}_{\mathbf{P}}^{\top} \mathbf{U}_{\mathbf{A}} \mathbf{\Lambda}_{\mathbf{A}}\|_F) \|\mathbf{\Sigma}_{\mathbf{A}}^{-1}\|_F \\
& = O(n^{-1} \log^{2\alpha+1}(n)),
\end{aligned}$$

where we have used part *iii*. The result follows from the fact that  $\left(1 + \frac{\sigma_i(\mathbf{P})}{\sigma_j(\mathbf{A})}\right) \geq 1$ .  $\square$

**Proposition 4.** Let  $\mathbf{U}_{\mathbf{P}}^{\top} \mathbf{U}_{\mathbf{A}} + \mathbf{I}_{p,q} \mathbf{U}_{\mathbf{P}}^{\top} \mathbf{U}_{\mathbf{A}} \mathbf{I}_{p,q}$  admit the singular value decomposition

$$\mathbf{U}_{\mathbf{P}}^{\top} \mathbf{U}_{\mathbf{A}} + \mathbf{I}_{p,q} \mathbf{U}_{\mathbf{P}}^{\top} \mathbf{U}_{\mathbf{A}} \mathbf{I}_{p,q} = \mathbf{W}_1 \mathbf{\Sigma} \mathbf{W}_2^{\top},$$

and let  $\mathbf{W} = \mathbf{W}_1 \mathbf{W}_2^{\top}$ . Then  $\mathbf{W} \in \mathbb{O}(d) \cap \mathbb{O}(p, q)$  and

$$\|\mathbf{U}_{\mathbf{P}}^{\top} \mathbf{U}_{\mathbf{A}} - \mathbf{W}\|_F, \|\mathbf{I}_{p,q} \mathbf{U}_{\mathbf{P}}^{\top} \mathbf{U}_{\mathbf{A}} \mathbf{I}_{p,q} - \mathbf{W}\|_F = O(n^{-1} \log^{2\alpha+1}(n))$$

almost surely.

*Proof.* A standard argument shows that a solution to the modified *one mode* orthogonal Procrustes problem

$$\widehat{\mathbf{W}} = \arg \min_{\mathbf{Q} \in \mathbb{O}(d)} \|\mathbf{P}_1^{\top} \mathbf{A}_1 - \mathbf{Q}\|_F^2 + \|\mathbf{P}_2^{\top} \mathbf{A}_2 - \mathbf{Q}\|_F^2$$

for matrices  $\mathbf{A}_i, \mathbf{P}_i \in \mathbb{R}^{n \times d}$  is given by  $\widehat{\mathbf{W}} = \widehat{\mathbf{W}}_1 \widehat{\mathbf{W}}_2^{\top}$ , where we have the singular value decomposition

$$\frac{1}{2}(\mathbf{P}_1^{\top} \mathbf{A}_1 + \mathbf{P}_2^{\top} \mathbf{A}_2) = \widehat{\mathbf{W}}_1 \mathbf{\Sigma} \widehat{\mathbf{W}}_2^{\top}.$$

Setting  $\mathbf{W}$  as in the statement of the proposition, we therefore observe that  $\mathbf{W}$  satisfies

$$\mathbf{W} = \arg \min_{\mathbf{Q} \in \mathbb{O}(d)} \|\mathbf{U}_{\mathbf{P}}^{\top} \mathbf{U}_{\mathbf{A}} - \mathbf{Q}\|_F^2 + \|\mathbf{I}_{p,q} \mathbf{U}_{\mathbf{P}}^{\top} \mathbf{U}_{\mathbf{A}} \mathbf{I}_{p,q} - \mathbf{Q}\|_F^2.$$

Let  $\mathbf{U}_{\mathbf{P}}^{\top} \mathbf{U}_{\mathbf{A}} = \mathbf{W}_{\mathbf{U},1} \mathbf{\Sigma}_{\mathbf{U}} \mathbf{W}_{\mathbf{U},2}^{\top}$  be the singular value decomposition of  $\mathbf{U}_{\mathbf{P}}^{\top} \mathbf{U}_{\mathbf{A}}$ , and define  $\mathbf{W}_{\mathbf{U}} \in \mathbb{O}(d)$  by  $\mathbf{W}_{\mathbf{U}} = \mathbf{W}_{\mathbf{U},1} \mathbf{W}_{\mathbf{U},2}^{\top}$ . Then

$$\begin{aligned} \|\mathbf{U}_{\mathbf{P}}^{\top} \mathbf{U}_{\mathbf{A}} - \mathbf{W}_{\mathbf{U}}\|_F &= \|\mathbf{\Sigma} - \mathbf{I}\|_F = \left( \sum_{i=1}^d (1 - \sigma_i)^2 \right)^{1/2} \leq \sum_{i=1}^d (1 - \sigma_i) \leq \sum_{i=1}^d (1 - \sigma_i^2) \\ &= \sum_{i=1}^d \sin^2(\theta_i) \leq d \|\mathbf{U}_{\mathbf{A}} \mathbf{U}_{\mathbf{A}}^{\top} - \mathbf{U}_{\mathbf{P}} \mathbf{U}_{\mathbf{P}}^{\top}\|^2 \\ &= O\left(n^{-1} \log^{2\alpha+1}(n)\right). \end{aligned}$$

Also,

$$\begin{aligned} \|\mathbf{I}_{p,q} \mathbf{U}_{\mathbf{P}}^{\top} \mathbf{U}_{\mathbf{A}} \mathbf{I}_{p,q} - \mathbf{W}_{\mathbf{U}}\|_F &\leq \|\mathbf{I}_{p,q} \mathbf{U}_{\mathbf{P}}^{\top} \mathbf{U}_{\mathbf{A}} \mathbf{I}_{p,q} - \mathbf{U}_{\mathbf{P}}^{\top} \mathbf{U}_{\mathbf{A}}\|_F + \|\mathbf{U}_{\mathbf{P}}^{\top} \mathbf{U}_{\mathbf{A}} - \mathbf{W}_{\mathbf{U}}\|_F \\ &\leq \|\mathbf{U}_{\mathbf{P}}^{\top} \mathbf{U}_{\mathbf{A}} \mathbf{I}_{p,q} - \mathbf{I}_{p,q} \mathbf{U}_{\mathbf{P}}^{\top} \mathbf{U}_{\mathbf{A}}\|_F + \|\mathbf{U}_{\mathbf{P}}^{\top} \mathbf{U}_{\mathbf{A}} - \mathbf{W}_{\mathbf{U}}\|_F \\ &= O\left(n^{-1} \log^{2\alpha+1}(n)\right) \end{aligned}$$

by Proposition 3.

Combining these shows that

$$\begin{aligned} \|\mathbf{U}_{\mathbf{P}}^{\top} \mathbf{U}_{\mathbf{A}} - \mathbf{W}\|_F^2 + \|\mathbf{I}_{p,q} \mathbf{U}_{\mathbf{P}}^{\top} \mathbf{U}_{\mathbf{A}} \mathbf{I}_{p,q} - \mathbf{W}\|_F^2 &\leq \|\mathbf{U}_{\mathbf{P}}^{\top} \mathbf{U}_{\mathbf{A}} - \mathbf{W}_{\mathbf{U}}\|_F^2 + \|\mathbf{I}_{p,q} \mathbf{U}_{\mathbf{P}}^{\top} \mathbf{U}_{\mathbf{A}} \mathbf{I}_{p,q} - \mathbf{W}_{\mathbf{U}}\|_F^2 \\ &= O\left(n^{-2} \log^{4\alpha+2}(n)\right), \end{aligned}$$

which gives the desired bound.

Finally, we observe that the matrix  $\mathbf{U}_{\mathbf{P}}^{\top} \mathbf{U}_{\mathbf{A}} + \mathbf{I}_{p,q} \mathbf{U}_{\mathbf{P}}^{\top} \mathbf{U}_{\mathbf{A}} \mathbf{I}_{p,q} \in \mathbb{R}^{p \times p} \oplus \mathbb{R}^{q \times q}$ , and thus the matrices  $\mathbf{W}_1, \mathbf{W}_2 \in \mathbb{O}(p) \oplus \mathbb{O}(q)$ , so in particular  $\mathbf{W} \in \mathbb{O}(d) \cap \mathbb{O}(p, q)$ .  $\square$

**Proposition 5.** The following bounds hold almost surely:

- i.*  $\|\mathbf{W}\Sigma_{\mathbf{A}} - \Sigma_{\mathbf{P}}\mathbf{W}\|_F = O(\log^{2\alpha+1}(n));$
- ii.*  $\|\mathbf{W}\Sigma_{\mathbf{A}}^{1/2} - \Sigma_{\mathbf{P}}^{1/2}\mathbf{W}\|_F = O(n^{-1/2}\log^{2\alpha+1}(n));$
- iii.*  $\|\mathbf{W}\Sigma_{\mathbf{A}}^{-1/2} - \Sigma_{\mathbf{P}}^{-1/2}\mathbf{W}\|_F = O(n^{-3/2}\log^{2\alpha+1}(n)).$

*Proof.* *i.* Observe that

$$\begin{aligned}\mathbf{W}\Sigma_{\mathbf{A}} - \Sigma_{\mathbf{P}}\mathbf{W} &= (\mathbf{W} - \mathbf{U}_{\mathbf{P}}^{\top}\mathbf{U}_{\mathbf{A}})\Sigma_{\mathbf{A}} + \mathbf{U}_{\mathbf{P}}^{\top}\mathbf{U}_{\mathbf{A}}\Sigma_{\mathbf{A}} - \Sigma_{\mathbf{P}}\mathbf{W} \\ &= (\mathbf{W} - \mathbf{U}_{\mathbf{P}}^{\top}\mathbf{U}_{\mathbf{A}})\Sigma_{\mathbf{A}} + (\mathbf{U}_{\mathbf{P}}^{\top}\mathbf{U}_{\mathbf{A}}\Sigma_{\mathbf{A}} - \Sigma_{\mathbf{P}}\mathbf{I}_{p,q}\mathbf{U}_{\mathbf{P}}^{\top}\mathbf{U}_{\mathbf{A}}\mathbf{I}_{p,q}) + \Sigma_{\mathbf{P}}(\mathbf{I}_{p,q}\mathbf{U}_{\mathbf{P}}^{\top}\mathbf{U}_{\mathbf{A}}\mathbf{I}_{p,q} - \mathbf{W}).\end{aligned}$$

Proposition 4 shows that the terms  $\|(\mathbf{W} - \mathbf{U}_{\mathbf{P}}^{\top}\mathbf{U}_{\mathbf{A}})\Sigma_{\mathbf{A}}\|_F$  and  $\|\Sigma_{\mathbf{P}}(\mathbf{I}_{p,q}\mathbf{U}_{\mathbf{P}}^{\top}\mathbf{U}_{\mathbf{A}}\mathbf{I}_{p,q} - \mathbf{W})\|_F$  are both  $O(\log^{2\alpha+1}(n))$ , while  $\|\mathbf{U}_{\mathbf{P}}^{\top}\mathbf{U}_{\mathbf{A}}\Sigma_{\mathbf{A}} - \Sigma_{\mathbf{P}}\mathbf{I}_{p,q}\mathbf{U}_{\mathbf{P}}^{\top}\mathbf{U}_{\mathbf{A}}\mathbf{I}_{p,q}\|_F$  is  $O(\log^{2\alpha+1}(n))$ , and so  $\|\mathbf{W}\Sigma_{\mathbf{A}} - \Sigma_{\mathbf{P}}\mathbf{W}\|_F = O(\log^{2\alpha+1}(n))$ .

*ii.* We will bound the absolute value of the terms  $(\mathbf{W}\Sigma_{\mathbf{A}}^{1/2} - \Sigma_{\mathbf{P}}^{1/2}\mathbf{W})_{ij}$ . Note that

$$\begin{aligned}\left|(\mathbf{W}\Sigma_{\mathbf{A}}^{1/2} - \Sigma_{\mathbf{P}}^{1/2}\mathbf{W})_{ij}\right| &= |\mathbf{W}_{ij}(\sigma_j(\mathbf{A})^{1/2} - \sigma_i(\mathbf{P})^{1/2})| = \left|\frac{\mathbf{W}_{ij}(\sigma_j(\mathbf{A}) - \sigma_i(\mathbf{P}))}{\sigma_j(\mathbf{A})^{1/2} + \sigma_i(\mathbf{P})^{1/2}}\right| \\ &= \frac{|(\mathbf{W}\Sigma_{\mathbf{A}} - \Sigma_{\mathbf{P}}\mathbf{W})_{ij}|}{\sigma_j(\mathbf{A})^{1/2} + \sigma_i(\mathbf{P})^{1/2}} \leq \frac{\|\mathbf{W}\Sigma_{\mathbf{A}} - \Sigma_{\mathbf{P}}\mathbf{W}\|_F}{\sigma_d(\mathbf{P})^{1/2}},\end{aligned}$$

and consequently we find that  $\|\mathbf{W}\Sigma_{\mathbf{A}}^{1/2} - \Sigma_{\mathbf{P}}^{1/2}\mathbf{W}\|_F = O(n^{-1/2}\log^{2\alpha+1}(n))$  by summing over all  $i, j \in \{1, \dots, d\}$  and applying part *i*.

**iii.** We will bound the absolute value of the terms  $\left(\mathbf{W}\Sigma_{\mathbf{A}}^{-1/2} - \Sigma_{\mathbf{P}}^{-1/2}\mathbf{W}\right)_{ij}$ . Note that

$$\begin{aligned} \left|\left(\mathbf{W}\Sigma_{\mathbf{A}}^{-1/2} - \Sigma_{\mathbf{P}}^{-1/2}\mathbf{W}\right)_{ij}\right| &= \left|\frac{\mathbf{W}_{ij}(\sigma_i(\mathbf{P})^{1/2} - \sigma_j(\mathbf{A})^{1/2})}{\sigma_i(\mathbf{P})^{1/2}\sigma_j(\mathbf{P})^{1/2}}\right| \\ &= \frac{\left|\left(\mathbf{W}\Sigma_{\mathbf{A}}^{1/2} - \Sigma_{\mathbf{P}}^{1/2}\mathbf{W}\right)_{ij}\right|}{\sigma_i(\mathbf{P})^{1/2}\sigma_j(\mathbf{A})^{1/2}} = O\left(n^{-3/2}\log^{2\alpha+1}(n)\right) \end{aligned}$$

by part **ii**. The result follows by summing over all  $i, j \in \{1, \dots, d\}$ .

□

**Proposition 6.** Let

$$\begin{aligned} \mathbf{R}_1 &= \mathbf{U}_{\mathbf{P}}(\mathbf{U}_{\mathbf{P}}^{\top}\mathbf{U}_{\mathbf{A}}\Sigma_{\mathbf{A}}^{1/2} - \Sigma_{\mathbf{P}}^{1/2}\mathbf{W}) \\ \mathbf{R}_2 &= (\mathbf{I} - \mathbf{U}_{\mathbf{P}}\mathbf{U}_{\mathbf{P}}^{\top})(\mathbf{A} - \mathbf{P})(\mathbf{U}_{\mathbf{A}}\mathbf{I}_{p,q} - \mathbf{U}_{\mathbf{P}}\mathbf{I}_{p,q}\mathbf{W})\Sigma_{\mathbf{A}}^{-1/2} \\ \mathbf{R}_3 &= -\mathbf{U}_{\mathbf{P}}\mathbf{U}_{\mathbf{P}}^{\top}(\mathbf{A} - \mathbf{P})\mathbf{U}_{\mathbf{P}}\mathbf{I}_{p,q}\mathbf{W}\Sigma_{\mathbf{A}}^{-1/2} \\ \mathbf{R}_4 &= (\mathbf{A} - \mathbf{P})\mathbf{U}_{\mathbf{P}}\mathbf{I}_{p,q}(\mathbf{W}\Sigma_{\mathbf{A}}^{-1/2} - \Sigma_{\mathbf{P}}^{-1/2}\mathbf{W}). \end{aligned}$$

Then the following bounds hold almost surely:

$$\begin{aligned} \textbf{i. } \|\mathbf{R}_1\|_{2 \rightarrow \infty} &= O\left(n^{-1}\log^{2\alpha+1}(n)\right); \\ \textbf{ii. } \|\mathbf{R}_2\|_{2 \rightarrow \infty} &= O\left(n^{-\frac{3}{4}}\log^{3\alpha+3/2}(n)\right); \\ \textbf{iii. } \|\mathbf{R}_3\|_{2 \rightarrow \infty} &= O\left(n^{-1}\log^{\alpha+1/2}(n)\right); \\ \textbf{iv. } \|\mathbf{R}_4\|_{2 \rightarrow \infty} &= O\left(n^{-1}\log^{3\alpha+3/2}(n)\right) \end{aligned}$$

In particular, we have  $\|n^{1/2}\mathbf{R}_i\|_{2 \rightarrow \infty} \rightarrow 0$  for all  $i$ .



*Proof. i.* Recall that  $\mathbf{U}_\mathbf{P} \Sigma_\mathbf{P}^{1/2} = \mathbf{X} \mathbf{Q}_\mathbf{X}$  for some  $\mathbf{Q}_\mathbf{X} \in \mathbb{O}(p, q)$  of bounded spectral norm. Using the relation  $\|\mathbf{A} \mathbf{P}\|_{2 \rightarrow \infty} \leq \|\mathbf{A}\|_{2 \rightarrow \infty} \|\mathbf{P}\|$  (see, for example, Cape et al. (2019b), Proposition 6.5) we find that  $\|\mathbf{U}_\mathbf{P}\|_{2 \rightarrow \infty} \leq \|\mathbf{X}\|_{2 \rightarrow \infty} \|\mathbf{Q}_\mathbf{X}\| \|\Sigma_\mathbf{P}^{-1}\|$ , and thus  $\|\mathbf{U}_\mathbf{P}\|_{2 \rightarrow \infty} = O(n^{-1/2})$  as the rows of  $\mathbf{X}$  are by definition bounded in Euclidean norm.

Thus

$$\begin{aligned} \|\mathbf{R}_1\|_{2 \rightarrow \infty} &\leq \|\mathbf{U}_\mathbf{P}\|_{2 \rightarrow \infty} \|\mathbf{U}_\mathbf{P}^\top \mathbf{U}_\mathbf{A} \Sigma_\mathbf{A}^{1/2} - \Sigma_\mathbf{P}^{1/2} \mathbf{W}\| \\ &\leq \|\mathbf{U}_\mathbf{P}\|_{2 \rightarrow \infty} \left( \|(\mathbf{U}_\mathbf{P}^\top \mathbf{U}_\mathbf{A} - \mathbf{W}) \Sigma_\mathbf{A}^{1/2}\|_F + \|\mathbf{W} \Sigma_\mathbf{A}^{1/2} - \Sigma_\mathbf{P}^{1/2} \mathbf{W}\|_F \right) \end{aligned}$$

The first summand is  $O(n^{-1/2} \log^{2\alpha+1}(n))$  by Proposition 4, while Proposition 5 shows that the second is  $O(n^{-1/2} \log^{2\alpha+1}(n))$ , and so

$$\|\mathbf{R}_1\|_{2 \rightarrow \infty} = O(n^{-1} \log^{2\alpha+1}(n)).$$

*ii.* We first observe that

$$\begin{aligned} &\|\mathbf{U}_\mathbf{P} \mathbf{U}_\mathbf{P}^\top (\mathbf{A} - \mathbf{P}) (\mathbf{U}_\mathbf{A} \mathbf{I}_{p,q} - \mathbf{U}_\mathbf{P} \mathbf{I}_{p,q} \mathbf{W}) \Sigma_\mathbf{A}^{-1/2}\|_{2 \rightarrow \infty} \\ &\leq \|\mathbf{U}_\mathbf{P}\|_{2 \rightarrow \infty} \|\mathbf{U}_\mathbf{P}^\top\| \|\mathbf{A} - \mathbf{P}\| \|\mathbf{U}_\mathbf{A} \mathbf{I}_{p,q} - \mathbf{U}_\mathbf{P} \mathbf{I}_{p,q} \mathbf{W}\| \|\Sigma_\mathbf{A}^{-1/2}\| \\ &= O\left(n^{-1/2} \cdot n^{1/2} \log^{\alpha+1/2}(n) \cdot n^{-1/2} \log^{2\alpha+1}(n) \cdot n^{-1/2}\right) \\ &= O\left(n^{-1} \log^{3\alpha+3/2}(n)\right), \end{aligned}$$

where we have bounded  $\|\mathbf{U}_\mathbf{A} \mathbf{I}_{p,q} - \mathbf{U}_\mathbf{P} \mathbf{I}_{p,q} \mathbf{W}\|$  by noting that

$$\begin{aligned} \|\mathbf{U}_\mathbf{A} \mathbf{I}_{p,q} - \mathbf{U}_\mathbf{P} \mathbf{I}_{p,q} \mathbf{W}\| &\leq \|\mathbf{U}_\mathbf{A} \mathbf{I}_{p,q} - \mathbf{U}_\mathbf{P} \mathbf{U}_\mathbf{P}^\top \mathbf{U}_\mathbf{A} \mathbf{I}_{p,q}\| + \|\mathbf{U}_\mathbf{P} \mathbf{I}_{p,q} (\mathbf{I}_{p,q} \mathbf{U}_\mathbf{P}^\top \mathbf{U}_\mathbf{A} \mathbf{I}_{p,q} - \mathbf{W})\| \\ &= O(n^{-1/2} \log^{2\alpha+1}(n)), \end{aligned}$$

by Propositions 3 and 4.

This leaves us to bound the term  $\|(\mathbf{A} - \mathbf{P})(\mathbf{U}_\mathbf{A}\mathbf{I}_{p,q} - \mathbf{U}_\mathbf{P}\mathbf{I}_{p,q}\mathbf{W})\Sigma_\mathbf{A}^{-1/2}\|_{2 \rightarrow \infty}$ . Now,

$$\begin{aligned} (\mathbf{A} - \mathbf{P})(\mathbf{U}_\mathbf{A}\mathbf{I}_{p,q} - \mathbf{U}_\mathbf{P}\mathbf{I}_{p,q}\mathbf{W})\Sigma_\mathbf{A}^{-1/2} &= (\mathbf{A} - \mathbf{P})(\mathbf{I} - \mathbf{U}_\mathbf{P}\mathbf{U}_\mathbf{P}^\top)\mathbf{U}_\mathbf{A}\mathbf{I}_{p,q}\Sigma_\mathbf{A}^{-1/2} \\ &\quad + (\mathbf{A} - \mathbf{P})\mathbf{U}_\mathbf{P}\mathbf{I}_{p,q}(\mathbf{I}_{p,q}\mathbf{U}_\mathbf{P}^\top\mathbf{U}_\mathbf{A}\mathbf{I}_{p,q} - \mathbf{W})\Sigma_\mathbf{A}^{-1/2}, \end{aligned}$$

and

$$\begin{aligned} \|(\mathbf{A} - \mathbf{P})\mathbf{U}_\mathbf{P}\mathbf{I}_{p,q}(\mathbf{I}_{p,q}\mathbf{U}_\mathbf{P}^\top\mathbf{U}_\mathbf{A}\mathbf{I}_{p,q} - \mathbf{W})\Sigma_\mathbf{A}^{-1/2}\|_{2 \rightarrow \infty} &\leq \|\mathbf{A} - \mathbf{P}\| \|\mathbf{U}_\mathbf{P}\| \|\mathbf{I}_{p,q}\mathbf{U}_\mathbf{P}^\top\mathbf{U}_\mathbf{A}\mathbf{I}_{p,q} - \mathbf{W}\| \|\Sigma_\mathbf{A}^{-1/2}\| \\ &= O\left(n^{1/2} \log^{\alpha+1/2}(n) \cdot n^{-1} \log^{2\alpha+1}(n) \cdot n^{-1/2}\right) \\ &= O\left(n^{-1} \log^{3\alpha+3/2}(n)\right) \end{aligned}$$

by Propositions 1 and 4.

To bound the remaining term, observe that we can rewrite

$$(\mathbf{A} - \mathbf{P})(\mathbf{I} - \mathbf{U}_\mathbf{P}\mathbf{U}_\mathbf{P}^\top)\mathbf{U}_\mathbf{A}\mathbf{I}_{p,q}\Sigma_\mathbf{A}^{-1/2} = (\mathbf{A} - \mathbf{P})(\mathbf{I} - \mathbf{U}_\mathbf{P}\mathbf{U}_\mathbf{P}^\top)\mathbf{U}_\mathbf{A}\mathbf{U}_\mathbf{A}^\top\mathbf{U}_\mathbf{A}\mathbf{I}_{p,q}\Sigma_\mathbf{A}^{-1/2}$$

and so

$$\|(\mathbf{A} - \mathbf{P})(\mathbf{I} - \mathbf{U}_\mathbf{P}\mathbf{U}_\mathbf{P}^\top)\mathbf{U}_\mathbf{A}\mathbf{I}_{p,q}\Sigma_\mathbf{A}^{-1/2}\|_{2 \rightarrow \infty} \leq \|\mathbf{R}\|_{2 \rightarrow \infty} \|\mathbf{U}_\mathbf{A}\mathbf{I}_{p,q}\Sigma_\mathbf{A}^{-1/2}\|,$$

where  $\mathbf{R} = (\mathbf{A} - \mathbf{P})(\mathbf{I} - \mathbf{U}_\mathbf{P}\mathbf{U}_\mathbf{P}^\top)\mathbf{U}_\mathbf{A}\mathbf{U}_\mathbf{A}^\top$ .

The latter term is  $O(n^{-1/2})$ , so it suffices to bound  $\|\mathbf{R}\|_{2 \rightarrow \infty}$ . To do this, we claim that the Frobenius norms of the rows of the matrix  $\mathbf{R}$  are exchangeable, and thus have the same expectation, which implies that  $\mathbb{E}(\|\mathbf{R}\|_F^2) = n\mathbb{E}(\|\mathbf{R}_i\|^2)$  for any  $i \in \{1, \dots, n\}$ . Applying Markov's inequality, we therefore see that

$$\mathbb{P}(\|\mathbf{R}_i\| > t) \leq \frac{\mathbb{E}(\|\mathbf{R}_i\|^2)}{t^2} = \frac{\mathbb{E}(\|\mathbf{R}\|_F^2)}{nt^2}.$$

Now,

$$\begin{aligned}
\|\mathbf{R}\|_F &\leq \|\mathbf{A} - \mathbf{P}\| \|\mathbf{A} - \mathbf{U}_\mathbf{P} \mathbf{U}_\mathbf{P}^\top \mathbf{A}\|_F \|\mathbf{U}_\mathbf{A}^\top\|_F \\
&= O\left(n^{1/2} \log^{\alpha+1/2}(n) \cdot n^{-1/2} \log^{\alpha+1/2}(n)\right) \\
&= O\left(\log^{2\alpha+1}(n)\right)
\end{aligned}$$

by Propositions 1 and 3.

It follows that

$$\mathbb{P}\left(\|\mathbf{R}_i\| > n^{-\frac{1}{4}} \log^{2\alpha+1}(n)\right) \leq cn^{-1/2}$$

and thus

$$\|\mathbf{R}\|_{2 \rightarrow \infty} = O\left(n^{-\frac{1}{4}} \log^{2\alpha+1}(n)\right)$$

almost surely.

We must therefore show that the Frobenius norms of the rows of  $\mathbf{R}$  are exchangeable. Let  $\mathbf{Q} \in \mathbb{O}(n)$  be a permutation matrix, and observe that for any matrix  $\mathbf{G} \in \mathbb{R}^{n \times n}$ , right multiplication by  $\mathbf{Q}^\top$  simply permutes the columns of  $\mathbf{G}$ , and thus does not alter the Frobenius norms of its rows. In particular, the Frobenius norms of the rows of  $\mathbf{Q}\mathbf{G}\mathbf{Q}^\top$  are the same as the Frobenius norms of the rows of  $\mathbf{Q}\mathbf{G}$ . For any symmetric matrix  $\mathbf{G} \in \mathbb{R}^{n \times n}$ , let  $\mathcal{P}_d(\mathbf{G})$  denote the projection onto the subspace spanned by the eigenvectors corresponding to the top  $d$  singular values of  $\mathbf{G}$ , and let  $\mathcal{P}_d^\perp(\mathbf{G})$  denote the projection onto the orthogonal complements of this subspace.

Note that

$$\mathcal{P}_d(\mathbf{P}) = \mathbf{U}_\mathbf{P} \mathbf{U}_\mathbf{P}^\top \quad \text{and} \quad \mathcal{P}_d(\mathbf{A}) = \mathbf{U}_\mathbf{A} \mathbf{U}_\mathbf{A}^\top,$$

while for any permutation matrix  $\mathbf{Q} \in \mathbb{O}(n)$  we have

$$\mathcal{P}_d(\mathbf{Q}\mathbf{P}\mathbf{Q}^\top) = \mathbf{Q}\mathbf{U}_{\mathbf{P}}\mathbf{U}_{\mathbf{P}}^\top\mathbf{Q}^\top \quad \text{and} \quad \mathcal{R}_d(\mathbf{Q}\mathbf{A}\mathbf{Q}^\top) = \mathbf{Q}\mathbf{U}_{\mathbf{A}}\mathbf{U}_{\mathbf{A}}^\top\mathbf{Q}^\top.$$

For any pair of matrices  $\mathbf{G}, \mathbf{H} \in \mathbb{R}^{n \times mn}$ , define an operator

$$\widehat{\mathcal{P}}_d(\mathbf{G}, \mathbf{H}) = (\mathbf{G} - \mathbf{H})\mathcal{P}_d^\perp(\mathbf{H})\mathcal{P}_d(\mathbf{G})$$

and note that  $\widehat{\mathcal{P}}_d(\mathbf{A}, \mathbf{P}) = \mathbf{R}$ , while

$$\begin{aligned} \widehat{\mathcal{P}}_d(\mathbf{Q}\mathbf{A}\mathbf{Q}^\top, \mathbf{Q}\mathbf{P}\mathbf{Q}^\top) &= \mathbf{Q}(\mathbf{A} - \mathbf{P})\mathbf{Q}^\top\mathbf{Q}(\mathbf{I} - \mathbf{U}_{\mathbf{P}}\mathbf{U}_{\mathbf{P}}^\top)\mathbf{Q}^\top\mathbf{Q}\mathbf{U}_{\mathbf{A}}\mathbf{U}_{\mathbf{A}}^\top\mathbf{Q}^\top \\ &= \mathbf{Q}\mathbf{R}\mathbf{Q}^\top. \end{aligned}$$

By assumption, the latent positions for our graphs are independent and identically distributed, and so the entries of the pair  $(\mathbf{A}, \mathbf{P})$  have the same joint distribution as those of the pair  $(\mathbf{Q}\mathbf{A}\mathbf{Q}^\top, \mathbf{Q}\mathbf{P}\mathbf{Q}^\top)$ . Therefore, the entries of the matrix  $\mathcal{P}_{\mathcal{L}}(\mathbf{A}, \mathbf{P})$  have the same joint distribution as those of the matrix  $\widehat{\mathcal{P}}_d(\mathbf{Q}\mathbf{A}\mathbf{Q}^\top, \mathbf{Q}\mathbf{P}\mathbf{Q}^\top)$ , which implies that  $\mathbf{R}$  has the same distribution as  $\mathbf{Q}\mathbf{R}\mathbf{Q}^\top$ , and consequently the Frobenius norms of the rows of  $\mathbf{R}$  have the same distribution as those of  $\mathbf{Q}\mathbf{R}$ , which proves our claim.

Combining these results, we see that

$$\|\mathbf{R}_2\|_{2 \rightarrow \infty} = O\left(n^{-\frac{3}{4}} \log^{3\alpha+3/2}(n)\right),$$

as required.

*iii.* Similarly to part *i.*, we see that

$$\begin{aligned}
\|\mathbf{R}_3\|_{2 \rightarrow \infty} &\leq \|\mathbf{U}_\mathbf{P}\|_{2 \rightarrow \infty} \|\mathbf{U}_\mathbf{P}^\top (\mathbf{A} - \mathbf{P}) \mathbf{U}_\mathbf{P} \mathbf{I}_{p,q} \mathbf{W} \Sigma_\mathbf{A}^{-1/2}\| \\
&\leq \|\mathbf{U}_\mathbf{P}\|_{2 \rightarrow \infty} \|\mathbf{U}_\mathbf{P}^\top (\mathbf{A} - \mathbf{P}) \mathbf{U}_\mathbf{P}\|_F \|\mathbf{W} \Sigma_\mathbf{A}^{-1/2}\|_F \\
&= O\left(n^{-1/2} \cdot \log^{\alpha+1/2}(n) \cdot n^{-1/2}\right) \\
&= O\left(n^{-1} \log^{\alpha+1/2}(n)\right)
\end{aligned}$$

by Proposition 2.

*iv.* Observe that

$$\begin{aligned}
\|\mathbf{R}_4\|_{2 \rightarrow \infty} &\leq \|\mathbf{R}_4\|_F \\
&\leq \|\mathbf{A} - \mathbf{P}\| \|\mathbf{U}_\mathbf{P}\|_F \|\mathbf{W} \Sigma_\mathbf{A}^{-1/2} - \Sigma_\mathbf{P}^{-1/2} \mathbf{W}\|_F \\
&= O\left(n^{-1} \log^{3\alpha+3/2}(n)\right)
\end{aligned}$$

by Propositions 1 and 5.

□

## 1.1 Proof of Theorem 1

*Proof.* Observe that

$$\begin{aligned}
\mathbf{X}_\mathbf{A} - \mathbf{X}_\mathbf{P} \mathbf{W} &= \mathbf{U}_\mathbf{A} \Sigma_\mathbf{A}^{1/2} - \mathbf{U}_\mathbf{P} \Sigma_\mathbf{P}^{1/2} \mathbf{W} \\
&= \mathbf{U}_\mathbf{A} \Sigma_\mathbf{A}^{1/2} - \mathbf{U}_\mathbf{P} \mathbf{U}_\mathbf{P}^\top \mathbf{U}_\mathbf{A} \Sigma_\mathbf{A}^{1/2} + \mathbf{U}_\mathbf{P} (\mathbf{U}_\mathbf{P}^\top \mathbf{U}_\mathbf{A} \Sigma_\mathbf{A}^{1/2} - \Sigma_\mathbf{P}^{1/2} \mathbf{W}) \\
&= \mathbf{U}_\mathbf{A} \Sigma_\mathbf{A}^{1/2} - \mathbf{U}_\mathbf{P} \mathbf{U}_\mathbf{P}^\top \mathbf{U}_\mathbf{A} \Sigma_\mathbf{A}^{1/2} + \mathbf{R}_{1,1}.
\end{aligned}$$

Noting that

$$\mathbf{U}_\mathbf{A} \Sigma_\mathbf{A}^{1/2} = \mathbf{A} \mathbf{U}_\mathbf{A} \mathbf{I}_{p,q} \Sigma_\mathbf{A}^{-1/2} \quad \text{and} \quad \mathbf{U}_\mathbf{P} \mathbf{U}_\mathbf{P}^\top \mathbf{P} = \mathbf{P},$$

we see that

$$\begin{aligned}
\mathbf{X}_\mathbf{A} - \mathbf{X}_\mathbf{P}\mathbf{W} &= \mathbf{A}\mathbf{U}_\mathbf{A}\mathbf{I}_{p,q}\Sigma_\mathbf{A}^{-1/2} - \mathbf{U}_\mathbf{P}\mathbf{U}_\mathbf{P}^\top\mathbf{A}\mathbf{U}_\mathbf{A}\mathbf{I}_{p,q}\Sigma_\mathbf{A}^{-1/2} + \mathbf{R}_{1,1} \\
&= \mathbf{A}\mathbf{U}_\mathbf{A}\mathbf{I}_{p,q}\Sigma_\mathbf{A}^{-1/2} - \mathbf{P}\mathbf{U}_\mathbf{A}\mathbf{I}_{p,q}\Sigma_\mathbf{A}^{-1/2} - (\mathbf{U}_\mathbf{P}\mathbf{U}_\mathbf{P}^\top\mathbf{A}\mathbf{U}_\mathbf{A}\mathbf{I}_{p,q}\Sigma_\mathbf{A}^{-1/2} - \mathbf{P}\mathbf{U}_\mathbf{A}\mathbf{I}_{p,q}\Sigma_\mathbf{A}^{-1/2}) + \mathbf{R}_1 \\
&= (\mathbf{A} - \mathbf{P})\mathbf{U}_\mathbf{A}\mathbf{I}_{p,q}\Sigma_\mathbf{A}^{-1/2} - (\mathbf{U}_\mathbf{P}\mathbf{U}_\mathbf{P}^\top\mathbf{A}\mathbf{U}_\mathbf{A}\mathbf{I}_{p,q}\Sigma_\mathbf{A}^{-1/2} - \mathbf{U}_\mathbf{P}\mathbf{U}_\mathbf{P}^\top\mathbf{P}\mathbf{U}_\mathbf{A}\mathbf{I}_{p,q}\Sigma_\mathbf{A}^{-1/2}) + \mathbf{R}_1 \\
&= (\mathbf{A} - \mathbf{P})\mathbf{U}_\mathbf{A}\mathbf{I}_{p,q}\Sigma_\mathbf{A}^{-1/2} - \mathbf{U}_\mathbf{P}\mathbf{U}_\mathbf{P}^\top(\mathbf{A} - \mathbf{P})\mathbf{U}_\mathbf{A}\mathbf{I}_{p,q}\Sigma_\mathbf{A}^{-1/2} + \mathbf{R}_1 \\
&= (\mathbf{I} - \mathbf{U}_\mathbf{P}\mathbf{U}_\mathbf{P}^\top)(\mathbf{A} - \mathbf{P})\mathbf{U}_\mathbf{A}\mathbf{I}_{p,q}\Sigma_\mathbf{A}^{-1/2} + \mathbf{R}_1 \\
&= (\mathbf{I} - \mathbf{U}_\mathbf{P}\mathbf{U}_\mathbf{P}^\top)(\mathbf{A} - \mathbf{P})\{\mathbf{U}_\mathbf{P}\mathbf{I}_{p,q}\mathbf{W} + (\mathbf{U}_\mathbf{A}\mathbf{I}_{p,q} - \mathbf{U}_\mathbf{P}\mathbf{I}_{p,q}\mathbf{W})\}\Sigma_\mathbf{A}^{-1/2} + \mathbf{R}_1 \\
&= (\mathbf{A} - \mathbf{P})\mathbf{U}_\mathbf{P}\mathbf{I}_{p,q}\mathbf{W}\Sigma_\mathbf{A}^{-1/2} + \mathbf{R}_3 + \mathbf{R}_2 + \mathbf{R}_1 \\
&= (\mathbf{A} - \mathbf{P})\mathbf{U}_\mathbf{P}\mathbf{I}_{p,q}\{\Sigma_\mathbf{P}^{-1/2}\mathbf{W} + (\mathbf{W}\Sigma_\mathbf{A}^{-1/2} - \Sigma_\mathbf{P}^{-1/2}\mathbf{W})\} + \mathbf{R}_3 + \mathbf{R}_2 + \mathbf{R}_1 \\
&= (\mathbf{A} - \mathbf{P})\mathbf{U}_\mathbf{P}\mathbf{I}_{p,q}\Sigma_\mathbf{P}^{-1/2}\mathbf{W} + \mathbf{R}_4 + \mathbf{R}_3 + \mathbf{R}_2 + \mathbf{R}_1.
\end{aligned}$$

Applying Proposition 6, we find that

$$\|\mathbf{X}_\mathbf{A} - \mathbf{X}_\mathbf{P}\mathbf{W}\|_{2 \rightarrow \infty} = \|(\mathbf{A} - \mathbf{P})\mathbf{U}_\mathbf{P}\mathbf{I}_{p,q}\Sigma_\mathbf{P}^{-1/2}\|_{2 \rightarrow \infty} + O\left(n^{-\frac{3}{4}} \log^{3\alpha+3/2}(n)\right).$$

Consequently,

$$\|\mathbf{X}_\mathbf{A} - \mathbf{X}_\mathbf{P}\mathbf{W}\|_{2 \rightarrow \infty} \leq \sigma_d(\mathbf{P})^{-1/2}\|(\mathbf{A} - \mathbf{P})\mathbf{U}_\mathbf{P}\|_{2 \rightarrow \infty} + O\left(n^{-\frac{3}{4}} \log^{3\alpha+3/2}(n)\right).$$

Letting  $u$  denote the  $j^{\text{th}}$  column of  $\mathbf{U}_\mathbf{P}$ , we note that for any  $i \in \{1, \dots, n\}$  we have

$$\begin{aligned}
\{(\mathbf{A} - \mathbf{P})\mathbf{U}_\mathbf{P}\}_{ij} &= \sum_{k=1}^n (\mathbf{A}_{ik} - \mathbf{P}_{ik})u_k \\
&= \sum_{k \neq i} (\mathbf{A}_{ik} - \mathbf{P}_{ik})u_k - \mathbf{P}_{ii}u_i.
\end{aligned}$$

The latter term is  $O(1)$ , while the former is a sum of independent zero-mean random variables satisfying

$$\begin{aligned} \mathbb{P} \left( \left| \sum_{k \neq i} (\mathbf{A}_{ik} - \mathbf{P}_{ik}) u_k \right| \geq t \right) &\leq 2 \exp \left( \frac{-2t^2}{4 \sum_{k \neq i} |u_k|^2} \right) \\ &\leq 2 \exp \left( \frac{-t^2}{2} \right) \end{aligned}$$

by Hoeffding's inequality. Thus  $\{(\mathbf{A} - \mathbf{P})\mathbf{U}_{\mathbf{P}}\}_{ij} = O\left(\log^{\alpha+1/2}(n)\right)$  almost surely, and hence  $\|\{(\mathbf{A} - \mathbf{P})\mathbf{U}_{\mathbf{P}}\}_i\| = O\left(\log^{\alpha+1/2}(n)\right)$  almost surely by summing over all  $j \in \{1, \dots, d\}$ . Taking the union bound over all  $n$  rows then shows that

$$\sigma_d(\mathbf{P})^{-1/2} \|(\mathbf{A} - \mathbf{P})\mathbf{U}_{\mathbf{P}}\|_{2 \rightarrow \infty} = O\left(n^{-1/2} \log^{\alpha+1/2}(n)\right),$$

and consequently that

$$\|\mathbf{X}_{\mathbf{A}}\mathbf{Q}_n - \mathbf{X}\|_{2 \rightarrow \infty} = O\left(n^{-1/2} \log^{3\alpha+3/2}(n)\right)$$

by multiplying on the right by  $\mathbf{Q}_n = \mathbf{W}^\top \mathbf{Q}_{\mathbf{X}}^{-1}$ . □

## 1.2 Proof of Theorem 2

*Proof.* From the proof of Theorem 1, we see that

$$n^{1/2}(\mathbf{X}_{\mathbf{A}}\mathbf{W}^\top \mathbf{Q}_{\mathbf{X}}^{-1} - \mathbf{X}) = n^{1/2}(\mathbf{A} - \mathbf{P})\mathbf{U}_{\mathbf{P}}\mathbf{I}_{p,q}\Sigma_{\mathbf{P}}^{-1/2}\mathbf{Q}_{\mathbf{X}}^{-1} + n^{1/2}\mathbf{R},$$

where  $\|n^{1/2}\mathbf{R}\|_{2 \rightarrow \infty} \rightarrow 0$  by Proposition 6.

Recall that the matrix  $\mathbf{Q}_{\mathbf{X}}$  was chosen so that

$$\mathbf{X}\mathbf{Q}_{\mathbf{X}} = \mathbf{X}_{\mathbf{P}} = \mathbf{U}_{\mathbf{P}}\Sigma_{\mathbf{P}}^{1/2},$$

and so

$$\mathbf{U}_\mathbf{P} \mathbf{I}_{p,q} \Sigma_\mathbf{P}^{-1/2} = \mathbf{U}_\mathbf{P} \Sigma_\mathbf{P}^{-1/2} \mathbf{I}_{p,q} = \mathbf{X} \mathbf{Q}_\mathbf{X} \Sigma_\mathbf{P}^{-1} \mathbf{I}_{p,q}.$$

Thus

$$n^{1/2}(\mathbf{A} - \mathbf{P}) \mathbf{U}_\mathbf{P} \mathbf{I}_{p,q} \Sigma_\mathbf{P}^{-1/2} \mathbf{Q}_\mathbf{X}^{-1} = n^{1/2}(\mathbf{A} - \mathbf{P}) \mathbf{X} \mathbf{Q}_\mathbf{X} \Sigma_\mathbf{P}^{-1} \mathbf{I}_{p,q} \mathbf{Q}_\mathbf{X}^{-1}.$$

Consequently,

$$\begin{aligned} n^{1/2} \left\{ (\mathbf{A} - \mathbf{P}) \mathbf{U}_\mathbf{P} \mathbf{I}_{p,q} \Sigma_\mathbf{P}^{-1/2} \mathbf{Q}_\mathbf{X}^{-1} \right\}_i^\top &= n^{1/2} (\mathbf{Q}_\mathbf{X} \Sigma_\mathbf{P}^{-1} \mathbf{I}_{p,q} \mathbf{Q}_\mathbf{X}^{-1})^\top \{ (\mathbf{A} - \mathbf{P}) \mathbf{X} \}_i^\top \\ &= (n \mathbf{Q}_\mathbf{X} \Sigma_\mathbf{P}^{-1} \mathbf{I}_{p,q} \mathbf{Q}_\mathbf{X}^{-1})^\top \left\{ n^{-1/2} \sum_{j=1}^n (\mathbf{A}_{ij} - \mathbf{P}_{ij}) \mathbf{X}_j \right\} \\ &= (n \mathbf{Q}_\mathbf{X} \Sigma_\mathbf{P}^{-1} \mathbf{I}_{p,q} \mathbf{Q}_\mathbf{X}^{-1})^\top \left\{ n^{-1/2} \sum_{j \neq i} (\mathbf{A}_{ij} - \mathbf{P}_{ij}) \mathbf{X}_j \right\} \\ &\quad - (n \mathbf{Q}_\mathbf{X} \Sigma_\mathbf{P}^{-1} \mathbf{I}_{p,q} \mathbf{Q}_\mathbf{X}^{-1})^\top (n^{-1/2} \mathbf{P}_{ii} \mathbf{X}_i). \end{aligned}$$

The latter term satisfies

$$\left\| (n \mathbf{Q}_\mathbf{X} \Sigma_\mathbf{P}^{-1} \mathbf{I}_{p,q} \mathbf{Q}_\mathbf{X}^{-1})^\top (n^{-1/2} \mathbf{P}_{ii} \mathbf{X}_i) \right\|_{2 \rightarrow \infty} \leq \left\| (n \mathbf{Q}_\mathbf{X} \Sigma_\mathbf{P}^{-1} \mathbf{I}_{p,q} \mathbf{Q}_\mathbf{X}^{-1})^\top (n^{-1/2} \mathbf{P}_{ii} \mathbf{X}_i) \right\| = O(n^{-1/2})$$

almost surely.

Conditional on the latent variable  $\mathbf{Z}_i = \mathbf{z} \in \mathcal{Z}$  from Definition 1, we have  $\mathbf{P}_{ij} = \phi(\mathbf{z})^\top \mathbf{I}_{p,q} \mathbf{X}_j$ , and so

$$n^{-1/2} \sum_{j \neq i} (\mathbf{A}_{ij} - \mathbf{P}_{ij}) \mathbf{X}_j$$

is a scaled sum of  $n - 1$  independent, zero-mean random variables, each with covariance matrix given by

$$\widehat{\Sigma}(\mathbf{z}) = \mathbb{E} \left\{ v(\mathbf{z}, \mathbf{Z}) \phi(\mathbf{Z}) \phi(\mathbf{Z})^\top \right\},$$



recalling that the function  $v(\mathbf{Z}_i, \mathbf{Z}_j)$  gives the variance of  $\mathbf{A}_{ij}$ . Therefore, by the multivariate central limit theorem,

$$n^{-1/2} \sum_{j \neq i} (\mathbf{A}_{ij} - \mathbf{P}_{ij}) \mathbf{X}_j \rightarrow \mathcal{N}(\mathbf{0}, \widehat{\Sigma}(\mathbf{z})).$$

Finally, we consider the terms  $(n\mathbf{Q}_\mathbf{X}\Sigma_\mathbf{P}^{-1}\mathbf{I}_{p,q}\mathbf{Q}_\mathbf{X}^{-1})^\top$ . Using the identities

$$\mathbf{Q}_\mathbf{X} = (\mathbf{X}^\top \mathbf{X})^{-1} \mathbf{X}^\top \mathbf{X}_\mathbf{P}, \quad \text{and} \quad \mathbf{X}_\mathbf{P}^\top \mathbf{X}_\mathbf{P} = \Sigma_\mathbf{P},$$

we see that

$$\begin{aligned} \mathbf{Q}_\mathbf{X}\Sigma_\mathbf{P}^{-1}\mathbf{I}_{p,q}\mathbf{Q}_\mathbf{X}^{-1} &= (\mathbf{X}^\top \mathbf{X})^{-1} \mathbf{X}^\top \mathbf{X}_\mathbf{P} \Sigma_\mathbf{P}^{-1} \mathbf{I}_{p,q} \mathbf{Q}_\mathbf{X}^{-1} \\ &= (\mathbf{X}^\top \mathbf{X})^{-1} \mathbf{Q}_\mathbf{X}^{-\top} \mathbf{X}_\mathbf{P}^\top \mathbf{X}_\mathbf{P} \Sigma_\mathbf{P}^{-1} \mathbf{I}_{p,q} \mathbf{Q}_\mathbf{X}^{-1} \\ &= (\mathbf{X}^\top \mathbf{X})^{-1} \mathbf{Q}_\mathbf{X}^{-\top} \mathbf{I}_{p,q} \mathbf{Q}_\mathbf{X}^{-1} \\ &= (\mathbf{X}^\top \mathbf{X})^{-1} \mathbf{I}_{p,q} \end{aligned}$$

and so

$$(n\mathbf{Q}_\mathbf{X}\Sigma_\mathbf{P}^{-1}\mathbf{I}_{p,q}\mathbf{Q}_\mathbf{X}^{-1})^\top \rightarrow \mathbf{I}_{p,q} \Delta^{-1}$$

almost surely by the law of large numbers.

Combining all this, we find that, conditional on  $\mathbf{Z}_i = \mathbf{z}$ ,

$$n^{-1/2} (\mathbf{X}_\mathbf{A} \mathbf{W}^\top \mathbf{Q}_\mathbf{X}^{-1} - \mathbf{X})_i^\top \rightarrow \mathcal{N}(\mathbf{0}, \Sigma(\mathbf{z}))$$

almost surely. □

## 2 Proofs for size-adjusted Chernoff information

Before beginning the proofs, it is convenient to write the summations in Corollary 1 as matrix products. The second moment matrix  $\Delta$  can be expressed as

$$\Delta = \sum_{k=1}^K \pi_k (\mathbf{X}_B)_k (\mathbf{X}_B)_k^\top = \mathbf{X}_B^\top \mathbf{\Pi} \mathbf{X}_B,$$

where  $\mathbf{\Pi} = \text{diag}(\pi_1, \dots, \pi_K)$ . Similarly, the covariance matrix  $\Sigma_k$  for  $k \in \{1, \dots, K\}$ , can be expressed as

$$\Sigma_k = \mathbf{I}_{p,q} \Delta^{-1} \left\{ \sum_{\ell=1}^K \pi_\ell \mathbf{C}_{k\ell} (\mathbf{X}_B)_\ell (\mathbf{X}_B)_\ell^\top \right\} \Delta^{-1} \mathbf{I}_{p,q} = \mathbf{I}_{p,q} \Delta^{-1} \mathbf{X}_B^\top \mathbf{\Pi} \mathbf{S}_k \mathbf{X}_B \Delta^{-1} \mathbf{I}_{p,q},$$

where  $\mathbf{S}_k = \text{diag}(\mathbf{C}_k) \in \mathbb{R}^{K \times K}$ . The expression for  $\Sigma_{k\ell}(t)$  has the same form as the above equation, replacing  $\mathbf{S}_k$  with its corresponding counterpart  $\mathbf{S}_{k\ell}(t) = (1-t)\mathbf{S}_k + t\mathbf{S}_\ell$ .

### 2.1 Proof of Lemma 1

*Proof.* If  $\mathbf{D} \in \mathbb{R}^{K \times K}$  is full rank, then for  $\mathbf{Y} \in \mathbb{R}^{K \times d}$ , the following matrix inequality holds (Marshall and Olkin, 1990),

$$\mathbf{Y} (\mathbf{Y}^\top \mathbf{D} \mathbf{Y})^{-1} \mathbf{Y}^\top \preceq \mathbf{D}^{-1},$$

where  $\mathbf{M} \succeq \mathbf{0}$  means that  $\mathbf{M}$  is a positive semi-definite matrix. However, in the case where  $\mathbf{D}$  and  $\mathbf{X} \in \mathbb{R}^{K \times K}$  are full rank, then the two sides of this inequality are equal,

$$\mathbf{X} (\mathbf{X}^\top \mathbf{D} \mathbf{X})^{-1} \mathbf{X}^\top = \mathbf{D}^{-1}.$$

If the block mean matrix  $\mathbf{B}$  is full rank, then adjacency spectral embedding  $\mathbf{X}_B$  is also full rank. Since  $\mathbf{B} = \mathbf{X}_B \mathbf{I}_{p,q} \mathbf{X}_B^\top$ , this means  $\text{rank}(\mathbf{B}) \leq \text{rank}(\mathbf{X}_B)$  implying  $\text{rank}(\mathbf{X}_B) = K$  when  $\text{rank}(\mathbf{B}) = K$ .

Using this matrix equality and the expression for  $\Delta$ , we have

$$\begin{aligned}
\Sigma_{k\ell}(t)^{-1} &= (\mathbf{I}_{p,q} \Delta^{-1} \mathbf{X}_B^\top \Pi \mathbf{S}_{k\ell}(t) \mathbf{X}_B \Delta^{-1} \mathbf{I}_{p,q})^{-1} \\
&= \mathbf{I}_{p,q} \mathbf{X}_B^\top \Pi \mathbf{X}_B (\mathbf{X}_B^\top \Pi \mathbf{S}_{k\ell}(t) \mathbf{X}_B)^{-1} \mathbf{X}_B^\top \Pi \mathbf{X}_B \mathbf{I}_{p,q} \\
&= \mathbf{I}_{p,q} \mathbf{X}_B^\top \Pi \mathbf{S}_{k\ell}(t)^{-1} \mathbf{X}_B \mathbf{I}_{p,q}
\end{aligned}$$

Substituting this expression into the objective function in the size-adjusted Chernoff information gives

$$\begin{aligned}
&\{(\mathbf{X}_B)_k - (\mathbf{X}_B)_\ell\}^\top \Sigma_{k\ell}(t)^{-1} \{(\mathbf{X}_B)_k - (\mathbf{X}_B)_\ell\} \\
&= (\mathbf{e}_k - \mathbf{e}_\ell)^\top \mathbf{X}_B \mathbf{I}_{p,q} \mathbf{X}_B^\top \Pi \mathbf{S}_{k\ell}(t)^{-1} \mathbf{X}_B \mathbf{I}_{p,q} \mathbf{X}_B^\top (\mathbf{e}_k - \mathbf{e}_\ell) \\
&= (\mathbf{e}_k - \mathbf{e}_\ell)^\top \mathbf{B} \Pi \mathbf{S}_{k\ell}(t)^{-1} \mathbf{B} (\mathbf{e}_k - \mathbf{e}_\ell),
\end{aligned}$$

using the expression  $\mathbf{B} = \mathbf{X}_B \mathbf{I}_{p,q} \mathbf{X}_B^\top$ . □

If the block mean matrix  $\mathbf{B}$  is not full rank, then the matrix inequality effectively passes through the whole argument in the above proof,

$$\Sigma_{k\ell}(t)^{-1} \preceq \mathbf{I}_{p,q} \mathbf{X}_B^\top \Pi \mathbf{S}_{k\ell}(t)^{-1} \mathbf{X}_B \mathbf{I}_{p,q},$$

which becomes a regular inequality when we compute the quadratic form. We get that, for  $\text{rank}(\mathbf{B}) \leq K$ ,

$$C \leq \min_{k \neq \ell} \sup_{t \in (0,1)} \left[ \frac{t(1-t)}{2} \{(\mathbf{e}_k - \mathbf{e}_\ell)^\top \mathbf{B} \Pi \mathbf{S}_{k\ell}(t)^{-1} \mathbf{B} (\mathbf{e}_k - \mathbf{e}_\ell)\} \right].$$

with equality when  $\mathbf{B}$  is full rank.

## 2.2 Proof of Lemma 2

*Proof.* By assumption **A** and **A'** have full rank block mean matrices, therefore, by Lemma 1, both stochastic block models have the same size-adjusted Chernoff information if they have the same value for

$$(\mathbf{e}_k - \mathbf{e}_\ell)^\top \mathbf{B} \Pi \mathbf{S}_{k\ell}(t)^{-1} \mathbf{B} (\mathbf{e}_k - \mathbf{e}_\ell).$$

For an affine entry-wise transformation, the entries of the block mean and variance matrices are given by  $\mathbf{B}'_{k\ell} = a\mathbf{B}_{k\ell} + b$  and  $\mathbf{C}'_{k\ell} = a^2\mathbf{C}_{k\ell}$ . Therefore,

$$\mathbf{B}'(\mathbf{e}_k - \mathbf{e}_\ell) = a\mathbf{B}(\mathbf{e}_k - \mathbf{e}_\ell),$$

$$\mathbf{S}'_{k\ell}(t)^{-1} = a^2\mathbf{S}_{k\ell}(t)^{-1},$$

where  $\mathbf{S}'_{k\ell}(t)^{-1}$  is the equivalent version of  $\mathbf{S}_{k\ell}(t)^{-1}$  in the entry-wise transformed stochastic block model. The contribution from  $a$  cancel and there is no contribution from  $b$ , meaning size-adjusted Chernoff information is unaffected by affine transformation.  $\square$

## 2.3 Changes of signature by affine transformation

We demonstrate the possible effects an affine transformation may have on the signature of a stochastic block model with dimension  $d$  and signature  $(p, q)$ . We focus on affine transformations with  $a > 0$  and  $b > 0$  although a similar analysis for other affine transformations leads to slight variations of the following results.

Consider a weighted stochastic block model with full rank block mean matrix **B** with signature  $(p, q)$  and let  $\lambda_i(\mathbf{B})$  denote the  $i^{\text{th}}$  smallest eigenvalue of **B**. The signature of **B** implies that  $\lambda_1(\mathbf{B}), \dots, \lambda_q(\mathbf{B}) < 0$  and  $\lambda_{q+1}(\mathbf{B}), \dots, \lambda_{p+q}(\mathbf{B}) > 0$ , since **B** is full rank, no eigenvalues are exactly zero.

The block mean matrix of the weighted stochastic block model after affine transformation is given by  $\mathbf{B}' = a\mathbf{B} + b\mathbf{1}\mathbf{1}^\top$ , where  $\mathbf{1} \in \mathbb{R}^n$  is the all-one vector. This is a rank-one perturbation of the scaled matrix  $a\mathbf{B}$ , therefore, by Horn and Johnson (2012), Corollary 4.3.9, the  $i^{\text{th}}$  eigenvalue of  $\mathbf{B}'$  lies between the  $i^{\text{th}}$  and  $(i+1)^{\text{th}}$  eigenvalue of  $\mathbf{B}$ , that is, for  $i = 1, \dots, d-1$ ,

$$\lambda_i(\mathbf{B}) \leq \lambda_i(\mathbf{B}') \leq \lambda_{i+1}(\mathbf{B}) \quad \text{and} \quad \lambda_d(\mathbf{B}) \leq \lambda_d(\mathbf{B}').$$

Figure 5 shows an example of this eigenvalue behavior. The only eigenvalue that can change sign after affine transformation is  $\lambda_q(\mathbf{B}')$ . In the example shown,  $\lambda_q(\mathbf{B}') > 0$ , meaning the signature of the stochastic block model after affine transformation is  $(p+1, q-1)$ ; if  $\lambda_q(\mathbf{B}') < 0$ , then the signature would have remained  $(p, q)$ . The other remaining possibility is that  $\lambda_q(\mathbf{B}') = 0$ , meaning that  $\mathbf{B}'$  is not full rank. In this case, the affine transformation block model would instead need to be embedded into  $d-1$  dimensions and would have signature  $(p, q-1)$ .

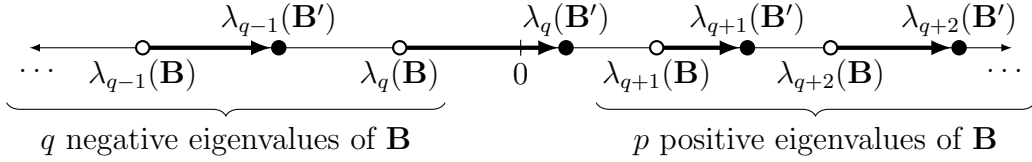

Figure 5: Number line showing the eigenvalues of mean block matrices close to the origin. White nodes represent eigenvalues of  $\mathbf{B}$  with full rank  $d$  and signature  $(p, q)$ , black nodes represent eigenvalues of  $\mathbf{B}' = a\mathbf{B} + b\mathbf{1}\mathbf{1}^\top$  with  $a > 0$ ,  $b > 0$ , full rank  $d$  and signature  $(p+1, q-1)$ .
